# Supplementary material
Source: MDPI journal article supplement (https://www.mdpi.com/2073-4344/14/5/316)
Supplement: s1 [file s1]

# Promoter Impact on 5Ni/SAPO-5 Catalyst for H<sub>2</sub> Production via Methane Partial Oxidation

Abdulaziz Al-Anazi <sup>1</sup>, Omer Bellahwel <sup>1</sup>, Kavitha C. <sup>2</sup>, Jehad Abu-Dahrieh <sup>3,\*</sup>, Ahmed A. Ibrahim <sup>1</sup>, S. Santhosh <sup>2</sup>, Ahmed E. Abasaheed <sup>1</sup>, Anis H. Fakeeha <sup>1</sup> and Ahmed S. Al-Fatesh <sup>1,\*</sup>

<sup>1</sup> Department of Chemical Engineering, College of Engineering, King Saud University (KSU), P.O. Box 800, Riyadh 11421, Saudi Arabia; aalanazi15@ksu.edu.sa (A.A.-A.); bellahwel000@gmail.com (O.B.); aidid@ksu.edu.sa (A.A.I.); abasaheed@ksu.edu.sa (A.E.A.); anishf@ksu.edu.sa (A.H.F.)

<sup>2</sup> Department of Chemistry, Dwaraka Doss Goverdhan Doss Vaishnav College (Autonomous), University of Madras, 833, Gokul Bagh, EVR Periyar Road, Arumbakkam, Chennai 600106, India; kavithakandhan@gmail.com (K.C.); santhoshsgp03@gmail.com (S.S.)

<sup>3</sup> School of Chemistry and Chemical Engineering, Queen's University Belfast, Belfast BT9 5AG, UK

\* Correspondence: j.abudahrieh@qub.ac.uk (J.A.-D.); aalfatesh@ksu.edu.sa (A.S.A.-F.)

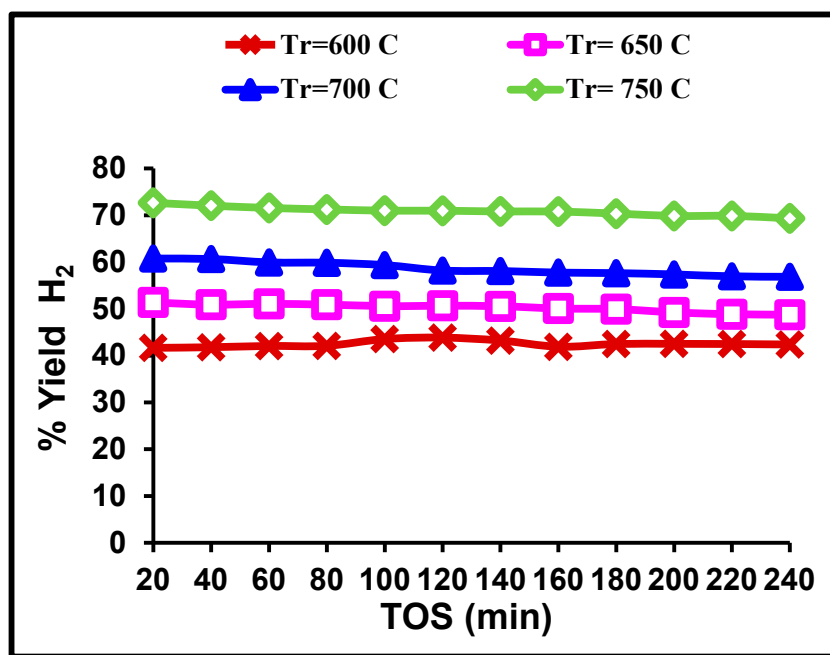

Figure S1: % H<sub>2</sub>-yield versus TOS at different reaction temperatures

**Table S1:** H<sub>2</sub> Uptake During TPR Analysis calcined at 600 °C

| Sample         | Temperature<br>(°C) | Total<br>Quantity<br>(cm <sup>3</sup> /gSTP) | Experimental<br>H <sub>2</sub> Capacity<br>(cm <sup>3</sup> /gSTP) | Theoretical<br>H <sub>2</sub> Capacity<br>(cm <sup>3</sup> /gSTP) | % Reduction |
|----------------|---------------------|----------------------------------------------|--------------------------------------------------------------------|-------------------------------------------------------------------|-------------|
| 5Ni/SAPO-5     | 667-983             | 2.26                                         | 2.26                                                               | 19.08                                                             | 11.84       |
| 5Ni+1Sr/SAPO-5 | 423-414-647-975     | 1.94                                         | 1.94                                                               | 19.08                                                             | 10.17       |
| 5Ni+1Ce/SAPO-5 | 431-660-973         | 1.78                                         | 1.78                                                               | 19.08                                                             | 9.33        |
| 5Ni+1Cu/SAPO-5 | 399-974             | 13.57                                        | 13.57                                                              | 19.08                                                             | 71.12       |
